# Supplementary material for: Associations between comorbidities, their treatment and survival in patients with interstitial lung diseases – a claims data analysis
Source: Respir Res. 2018 Apr 25;19:73. doi: 10.1186/s12931-018-0769-0 (PMC5918773; doi:10.1186/s12931-018-0769-0)
Supplement: Supplementary file 9 — Table S7. Associations of clinical characteristics and survival within the sensitivity analyses. (DOC 146 kb) [file 12931_2018_769_MOESM9_ESM.doc]

Table S7: Associations of clinical characteristics and survival within the sensitivity analyses

| **Variable** | | **Comorbidity-only  Cox model** | | **Drug-extended  Cox model** | |
| --- | --- | --- | --- | --- | --- |
| **SA1** | **SA2** | **SA1** | **SA2** |
| **Comorbidity profile** | Congestive heart failure treated | 1.53*** | 1.62*** | 1.48*** | 1.57*** |
| Congestive heart failure untreated | 1.42*** | 1.57*** | 1.34*** | 1.52*** |
| Cardiac arrhythmia treated | 0.95n.s | not sel. | 0.95n.s | not sel. |
| Cardiac arrhythmia untreated | 1.15*** | 1.08* | 1.15*** | 1.00n.s |
| Valvular disease treated | 0.94** | 0.89*** | 0.94* | 0.90** |
| Valvular disease untreated | 1.14** | 1.26*** | 1.06 n.s | 1.12* |
| Pulmonary hypertension treated | 1.36*** | 1.24*** | 1.20*** | 1.16** |
| Pulmonary hypertension untreated | 1.46*** | 1.29*** | 1.57*** | 1.31*** |
| Peripheral vascular disorders treated | 1.07* | not sel. | 1.14*** | 1.07n.s |
| Peripheral vascular disorders untreated | 1.17*** | 1.0ns | 1.13*** | 1.11** |
| Hypertension without complications treated | 0.94* | 0.83ns | 1.06ns | not sel. |
| Hypertension without complications untreated | 1.22*** | 1.01ns | 1.01ns | 0.94ns |
| Hypertension with complications treated | 0.80*** | 0.97ns | 0.91** | 0.97 s |
| Hypertension with complications untreated | 1.07 n.s | 1.26*** | 0.91*** | 0.83* |
| COPD treated | 0.97n.s | 0.86*** | 0.91ns | 0.78*** |
| COPD untreated | **1.09***** | 1.00ns | 1.11ns | **0.91***** |
| Diabetes without complications treated | 1.07ns | 0.79** | not sel. | not sel. |
| Diabetes without complications untreated | 1.14*** | 0.92*** | 1.31*** | 1.20ns |
| Diabetes with complications treated | **1.11***** | 1.06ns | **0.79**** | not sel. |
| Diabetes with complications untreated | 1.19*** | 1.17*** | 1.15*** | 1.22ns |
| Hypothyroidism | 0.88*** | 0.94ns | 0.89ns | 0.94ns |
| Renal failure | 1.25*** | 1.32*** | 1.23*** | 1.32*** |
| Liver disease | 1.05* | not sel. | 1.05** | not sel. |
| Metastatic carcinoma | 2.30*** | 2.69** | 2.77*** | 2.63** |
| Solid tumour without metastasis | 1.15*** | 1.09*** | 1.09*** | 1.10*** |
| Rheumatoid arthritis/Connective tissue disorder | 0.91** | 0.82*** | 0.89** | 0.81*** |
| Coagulopathy | 1.37*** | 1.59*** | 1.34*** | 1.59*** |
| Obesity | 0.91*** | 0.87*** | 0.92*** | 0.89*** |
| Weight loss | 1.51*** | 1.58*** | 1.50* | 1.52*** |
| Fluid and electrolyte disorders | 1.65*** | 2.41*** | 1.62ns | 2.37*** |
| Deficiency anaemia | 1.09* | 1.11* | 1.08ns | 1.10* |
| Depression treated | 1.00ns | 1.00n.s | not sel. | not sel. |
| Depression untreated | not sel. | not sel. | 1.07ns | not sel. |
| IHD treated | not sel. | not sel. | 0.95n.s | 1.03ns |
| IHD untreated | not sel. | 1.09** | 1.25*** | 1.41*** |
| GERD treated | 0.92** | 0.84*** | 0.89*** | 0.87*** |
| GERD untreated | 0.92* | 0.88* | 0.97ns | 0.86** |
| OSAS | 0.78*** | 0.70*** | 0.78*** | 0.71*** |
|  | Lung cancer | 1.80*** | 1.93*** | not sel. | 1.92*** |
| **Medication intake** | Digitalis glycosides |  |  | 1.06ns | 1.01ns |
| Anti-arrhythmic drugs |  |  | 0.85* | 0.80* |
| Diuretic drugs |  |  | 1.25*** | 1.16*** |
| Statins |  |  | 0.85*** | 0.84*** |
| Beta-blockers |  |  | 0.96*** | 0.89** |
| ACE inhibitors |  |  | 0.84ns | 0.84*** |
| Angiotensin-I-antagonists |  |  | 0.74*** | 0.71*** |
| Antiplatelet drugs |  |  | 1.10*** | 1.09** |
| Vitamin-K antagonists |  |  | 1.07ns | 1.06ns |
| Heparin (-derivates) |  |  | not sel. | 0.87** |
| Proton pump inhibitors |  |  | 1.05* | 0.97ns |
| H2-antagonists |  |  | 1.24* | 1.17ns |
| Treatment with anti-depressants |  |  | 1.15** | 1.09* |
| Treatment with anti-diabetic drugs |  |  | 1.39** | 1.23ns |
| Long-acting beta2 agonists (LABA) |  |  | not sel. | 1.03ns |
| Long-acting muscarinic antagonists (LAMA) |  |  | 1.18*** | 1.13** |
| Inhaled corticosteroids (ICS) |  |  | 0.93* | 0.80*** |
| Combination product LABA/ICS |  |  | 0.97n.s | 0.94ns |
| Combination product LABA/LAMA |  |  | not sel. | not sel. |
| Anti-hypertensive drugs |  |  | 1.84*** | 1.46*** |

All figures adjusted for age, gender and ILD subtype

HR = hazard ratio; not sel: not selected by LASSO

Variables with significantly positive impact shaded grey; those with impact in opposite direction in bold letters

Significance codes: p < 0.001 '***' | p < 0.01 '**' | p< 0.05 '*' | not significant ‘ns’.
